# 1 **Draft Genome Sequence of psychrotolerant** 2 ***Clostridium* sp. M14 Isolated from Spoiled Uncooked** 3 **Venison.**

4 Nikola Palevich<sup>a</sup>, Faith P. Palevich<sup>a</sup>, Paul H. Maclean<sup>a</sup>, Ruy Jauregui<sup>a</sup>, Eric Altermann<sup>a,b</sup>, John  
5 Mills<sup>a</sup> and Gale Brightwell<sup>a</sup>.

6 <sup>a</sup>AgResearch Limited, Grasslands Research Centre, Palmerston North, New Zealand.

7 <sup>b</sup>Riddet Institute, Massey University, Palmerston North, New Zealand.

8 Corresponding author: E-mail: [nik.palevich@agresearch.co.nz](mailto:nik.palevich@agresearch.co.nz).

## 9 **ABSTRACT**

10 The non-proteolytic, non-toxicogenic and psychrotolerant *Clostridium* sp. M14 was isolated from  
11 vacuum-packaged refrigerated spoiled venison. This report describes the generation and  
12 annotation of the 3.9 Mb draft genome sequence of *Clostridium* sp. M14.

## 13 **ANNOUNCEMENT**

14 The psychrotolerant *Clostridium* sp. M14 is a Gram-positive, rod-shaped, spore-forming and  
15 slow-growing obligate anaerobe. M14 is able to grow at temperatures below 4°C, is catalase<sup>+</sup>  
16 and oxidase<sup>-</sup>negative and metronidazole<sup>-</sup>sensitive, and originally isolated from vacuum-  
17 packaged refrigerated spoiled venison (1). Numerous bacterial species belonging to the  
18 *Clostridium* genera have been recognized as causative agents of blown pack spoilage (BPS) in  
19 vacuum packed meat products (2), and M14 was selected for genome sequencing to examine its  
20 role in BPS.

21 Previous studies identified a number of isolates with some similarity to that of non-proteolytic *C.*  
22 *botulinum* type B using classical bio-chemical differentiation, 16S rRNA gene Restriction

23 Fragment Length Polymorphism (RFLP) pattern analyses, 16S rRNA gene sequencing and PCR  
24 amplification of the ITS regions (1, 3). However, none of these isolates were deemed toxigenic.  
25 Broda *et al.*, concluded that although the growth of such microorganisms in vacuum-packed  
26 chilled meat leads to product spoilage, it does not prejudice product safety. Here, we present a  
27 draft genome sequence of a representative meat spoilage associated non-proteolytic and non-  
28 toxigenic psychrotolerant *Clostridium* sp. M14, that falls within meat associated psychrotolerant  
29 *Clostridium* ARDRA Group 7 (4).

30 Strain M14 was isolated from a fully blown pack of vacuum packaged venison nearly 20 years  
31 ago and cultured anaerobically at 10°C in pre-reduced Peptone, Yeast Extract, Glucose, Starch  
32 broth (PYGS) as previously described (5). Genomic DNA was extracted using a modified  
33 phenol-chloroform procedure (5) and mechanically sheared using a Nebulizer instrument  
34 (Invitrogen) to select fragments of approximately 550 bp. A DNA library was prepared using the  
35 Illumina TruSeq™ Nano method and sequenced on the Illumina MiSeq platform with the 2× 250  
36 bp paired-end (PE) reagent kit v2 producing a total of 3,125,724 PE raw reads. The quality of the  
37 raw reads was checked in FastQC v0.11.5  
38 (<https://www.bioinformatics.babraham.ac.uk/projects/fastqc/>), the reads were trimmed with  
39 Trimmomatic v0.39 (<http://www.usadellab.org/cms/?page=trimmomatic>) and assembled using  
40 the A5-miseq pipeline v20169825 with standard parameters (6). The *de novo* assembly of M14  
41 produced 36 scaffolds with 184× coverage and an N50 value of 757,921 bp, with the largest  
42 scaffold length being 1,669,648 bp in size. The draft genome sequence is composed of 3,986,879  
43 bp, with a %G+C content of 27.1%. A total of 3,717 putative protein-coding genes (PCGs) were  
44 predicted along with 81 tRNA, 19 rRNA, 170 ncRNA elements using GAMOLA2 (7). In  
45 addition, Diamond v0.9.21.122 (8) and InterProScan v5.36-75.0 (9) were used to search the

46 NCBI “nr” database with the resulting protein set imported into BLAST2GO as implemented in  
47 the OmicsBox software package v1.1.164 (10) where gene ontology terms and final annotations  
48 were assigned to each protein. All bioinformatics analyses were performed using default settings  
49 and parameters.

50 Carbohydrate-Active enZYme (11) profiling was analyzed using dbCAN2 (12) and revealed that  
51 the M14 genome is predicted to encode 44 glycoside hydrolases (GHs), 27 glycosyl transferases  
52 (GTs), 10 carbohydrate esterases (CEs) and 19 carbohydrate-binding protein module (CBM)  
53 families. Overall, approximately 2.7% of the M14 genome (100 CDSs) is predicted to encode  
54 either secreted or intracellular proteins dedicated to carbohydrate and even polysaccharide  
55 degradation. A comparison of the M14 with the recently characterized *C. estertheticum* subsp.  
56 *laramiense* type strain DSM 14864<sup>T</sup> (ATCC 51254) (5), revealed clear differences in their  
57 enzymatic profiles. While both appear to be equipped to utilize many oligo- and  
58 monosaccharides as substrates for growth and encode a large repertoire of enzymes predicted to  
59 metabolize complex insoluble polysaccharides, M14 lacked genes encoding polysaccharide  
60 lyases (PLs).

61 The non-toxigenic status of M14 was confirmed by performing a bioinformatics search of the  
62 whole genome sequence (WGS) database (visited March 2020) at the National Center for  
63 Biotechnology Information (NCBI), using the predicted protein translation products of the  
64 known deadly neurotoxins of *C. botulinum* (BoNTs) protein sequences. None of the putative  
65 neurotoxin genes within the Group II *C. botulinum* BoNT operon that consists of *ha*  
66 (haemagglutinin) types (*ha70*, *ha17* and *ha34*) and accessory proteins *ntnh* (nontoxic-  
67 nonhaemagglutinin) and *botR* (neurotoxin regulator protein) upstream of the boNT gene, were  
68 identified in M14. In addition, a whole-genome alignment to the publicly available Group II *C.*

69 *botulinum* genomes revealed a low sequence homology with approximately <20% similarity to  
70 M14.

71 The genome sequence of the psychrotolerant *Clostridium* sp. M14 reported here is a valuable  
72 resource for future studies investigating the bacterial genetic mechanisms associated with BPS.  
73 In order to improve the phylogenetic resolution of the *Clostridium* genera and improve our  
74 limited knowledge of meat spoilage caused by non-toxigenic *Clostridia* species.

75 **Data availability.** The genome sequence and associated data for *Clostridium* sp. M14 were  
76 deposited under GenBank accession number JAAMNF000000000, BioProject accession number  
77 PRJNA574489 and in the Sequence Read Archive (SRA) under accession number  
78 SRR11113219.

## 79 REFERENCES

- 80 1. Broda DM, Boerema JA, Bell RG. 1998. A PCR survey of psychrotrophic *Clostridium*  
81 *botulinum*□like isolates for the presence of BoNT genes. *Letters in Applied Microbiology*,  
82 27:219-223. <https://doi.org/10.1046/j.1472-765X.1998.00420.x>.
- 83 2. Mills J, Donnison A, Brightwell G. 2014. Factors affecting microbial spoilage and shelf-life  
84 of chilled vacuum-packed lamb transported to distant markets: A review. *Meat Science*,  
85 98:71-80. <https://doi.org/10.1016/j.meatsci.2014.05.002>.
- 86 3. Broda DM, Boerema JA, Bell RG. 2003. PCR detection of psychrophilic *Clostridium* spp.  
87 causing ‘blown pack’ spoilage of vacuum-packed chilled meats. *Journal of Applied*  
88 *Microbiology*, 94:515-522. <https://doi.org/10.1046/j.1365-2672.2003.01859.x>.
- 89 4. Brightwell G, Horváth KM. 2018. Molecular discrimination of New Zealand sourced meat  
90 spoilage associated psychrotolerant *Clostridium* species by ARDRA and its comparison with  
91 16s RNA gene sequencing. *Meat Science*, 138:23-27.  
92 <https://doi.org/10.1016/j.meatsci.2017.12.007>.
- 93 5. Palevich N, Palevich FP, Maclean PH, Jauregui R, Altermann E, Mills J, Brightwell G.  
94 2019. Draft Genome Sequence of *Clostridium estertheticum* subsp. *laramiense* DSM  
95 14864<sup>T</sup>, Isolated from Spoiled Uncooked Beef. *Microbiology Resource Announcements*,  
96 8:e01275-19. <https://doi.org/10.1128/MRA.01275-19>.
- 97 6. Coil D, Jospin G, Darling AE. 2014. A5-miseq: an updated pipeline to assemble microbial  
98 genomes from Illumina MiSeq data. *Bioinformatics* 31:587-589.  
99 <https://doi.org/10.1093/bioinformatics/btu661>.
- 100 7. Altermann E, Lu J, McCulloch A. 2017. GAMOLA2, a comprehensive software package for  
101 the annotation and curation of draft and complete microbial genomes. *Front Microbiol*  
102 8:346. <https://doi.org/10.3389/fmicb.2017.00346>.
- 103 8. Buchfink B, Xie C, Huson DH. 2015. Fast and sensitive protein alignment using  
104 DIAMOND. *Nat Methods* 12:59. <https://doi.org/10.1038/nmeth.3176>.
- 105 9. Jones P, Binns D, Chang H-Y, Fraser M, Li W, McAnulla C, McWilliam H, Maslen J,  
106 Mitchell A, Nuka G. 2014. InterProScan 5: genome-scale protein function classification.  
107 *Bioinformatics* 30:1236-1240. <https://doi.org/10.1093/bioinformatics/btu031>.
- 108 10. Conesa A, Götz S, García-Gómez JM, Terol J, Talón M, Robles M. 2005. Blast2GO: a  
109 universal tool for annotation, visualization and analysis in functional genomics research.  
110 *Bioinformatics* 21:3674-3676. <https://doi.org/10.1093/bioinformatics/bti610>.
- 111 11. Cantarel BL, Coutinho PM, Rancurel C, Bernard T, Lombard V, Henrissat B. 2009. The  
112 Carbohydrate-Active EnZymes database (CAZy): an expert resource for glycogenomics.  
113 *Nucleic Acids Res* 37:D233-D238. <https://doi.org/10.1093/nar/gkn663>.
- 114 12. Zhang H, Yohe T, Huang L, Entwistle S, Wu P, Yang Z, Busk PK, Xu Y, Yin Y. 2018.  
115 dbCAN2: a meta server for automated carbohydrate-active enzyme annotation. *Nucleic*  
116 *Acids Res* 46:W95-W101. <https://doi.org/10.1093/nar/gky418>.
